# Supplementary material for: Electrochemical degradation of ciprofloxacin with a Sb-doped SnO2 electrode: performance, influencing factors and degradation pathways
Source: Royal Society of Chemistry journal article supplement (doi:10.1039/c9ra04860j), 2019-01-01
Supplement: c9ra04860j1.pdf [file c9ra04860j1.pdf]

# Supplementary Materials

## Electrochemical degradation of ciprofloxacin with a Sb-doped SnO<sub>2</sub> electrode: Performances, influencing factors and degradation pathways

Yanguang Mu<sup>a</sup>, Cong Huang<sup>a</sup>, Haipu Li <sup>a,b\*</sup>, Leilei Chen<sup>a</sup>, Ding Zhang<sup>a</sup>, Zhaoguang

Yang <sup>a,b\*</sup>

<sup>a</sup> Center for Environment and Water Resources, College of Chemistry and Chemical

Engineering, Central South University, Changsha 410083, PR China

<sup>b</sup> Key Laboratory of Hunan Province for Water Environment and Agriculture Product

Safety, Changsha 410083, PR China

\*Corresponding author.

E-mail addresses: [lihaipu@csu.edu.cn](mailto:lihaipu@csu.edu.cn) (Haipu Li), [zgyang@csu.edu.cn](mailto:zgyang@csu.edu.cn) (Zhaoguang

Yang)

### Captions

Text S1 Analysis of intermediates with the Liquid Chromatography-mass spectrometry

Table S1 Crystallite size, lattice parameters, A, and C<sub>dl</sub> of different electrodes.

Table S2 Comparison of EIS results as determined by the equivalent circuit fit.

Table S3 Summary of removal rates and kinetic constants of CIP (90 min).

Table S4 The possible intermediate products in the CIP degradation

Fig. S1 CV curves of electrodes in 0.1 M KCl solution containing 1 mM K<sub>3</sub>Fe(CN)<sub>6</sub>:

(a) SSO-8, (b) SSO-10, (c) SSO-12, (d) SSO-14, (e) SSO-16, and (f) SSO-20.

23 **Fig. S2** CV curves of different electrodes in 0.5 M KOH solution: (a) SSO-8, (b)  
24 SSO-10, (c) SSO-12, (d) SSO-14, (e) SSO-16, and (f) SSO-20.

25 **Fig. S3** Three-dimensional excitation-emission matrix fluorescence spectra of the CIP  
26 solution after electrocatalytic degradation of 0 min, 15 min, 30 min, 45min, 60min,  
27 and 90 min under the optimal conditions.

28 **Fig. S4** CV curves of the SSO-16 electrode with the absence and presence of CIP.

29 **Fig. S5** Fluorescence spectral of electrochemical oxidation of 0.5 mM terephthalic  
30 acid solution with the SSO-16 electrode.

31 **Fig. S6** TOC removal ratio as a function of time under the optimal degradation  
32 conditions.

33 **Fig. S7** Relative intensity variations of intermediates during the process of CIP  
34 degradation.

35 **Fig. S8** SEM image of the SSO-16 electrode after eight cycles of experiment.

36 **Fig. S9** The XRD pattern of the SSO-16 electrode after eight cycles of experiment.

37 Text S1 Analysis of intermediates with the Liquid Chromatography-mass  
38 spectrometry

39 The degradation intermediates were analyzed by an Agilent 6460 triple quadrupole  
40 mass spectrometer equipped with an electrospray ionization (ESI) source, combined  
41 with an Agilent 1260 series Liquid Chromatography system. Chromatographic  
42 separation was carried out with an Agilent Zorbax Bonus-RP column (2.1 mm i.d. ×  
43 50 mm, particle size 2.7 μm). The mobile phase consisted of A (water with 0.1%  
44 formic acid as a modifier) and B (methanol). The mobile-phase gradient was as  
45 follows: 0 min, B 20%; 7 min, B 60%; 15 min, B 80%, and then returned to the initial  
46 conditions within 1 min. The total run time was 22 min. The analytes were determined  
47 in positive ionization mode, using the following MS operation parameters: capillary  
48 voltage: 4000 V (+); nebulizer pressure: 40 psi; drying gas: 8 L min<sup>-1</sup>; source  
49 temperature: 350°C. The collision energy was selected according to the requirements  
50 of the different measurements.

51

52 **Table S1** Crystallite size, lattice parameters,  $A$ , and  $C_{dl}$  of different electrodes

| Electrode             | Crystallite size (nm) | Lattice parameters |       | $A^b$ (cm <sup>2</sup> ) | $C_{dl}^c$ (mF) |
|-----------------------|-----------------------|--------------------|-------|--------------------------|-----------------|
|                       |                       | a = b (Å)          | c (Å) |                          |                 |
| SSO-8                 | 246.1                 | 4.754              | 3.113 | 2.35                     | 1.65            |
| SSO-10                | 45.6                  | 4.749              | 3.193 | 2.16                     | 1.49            |
| SSO-12                | 14.8                  | 4.710              | 3.164 | 3.4                      | 7.07            |
| SSO-14                | 12.2                  | 4.709              | 3.196 | 3.53                     | 2.72            |
| SSO-16                | 28.6                  | 4.673              | 3.198 | 3.74                     | 5.83            |
| SSO-20                | 37.2                  | 4.720              | 3.143 | 2.88                     | 0.45            |
| Standard <sup>a</sup> | -                     | 4.738              | 3.187 | -                        | -               |

53 <sup>a</sup> The lattice parameters of SnO<sub>2</sub> (JCPDF 72-1147).

54 <sup>b</sup> Electrochemical active area.

55 <sup>c</sup> Electrochemical double layer capacitance.

56 **Table S2** Comparison of EIS results as determined by the equivalent circuit fit.

| Electrode | $R_e$<br>( $\Omega \text{ cm}^2$ ) | $Q_{dl}$<br>( $\times 10^{-5}$ ) | n    | $R_{ct}$<br>( $\Omega \text{ cm}^2$ ) | $C_{ads}$<br>( $\mu\text{F cm}^{-2}$ ) | $R_{ads}$<br>( $\Omega \text{ cm}^2$ ) |
|-----------|------------------------------------|----------------------------------|------|---------------------------------------|----------------------------------------|----------------------------------------|
| SSO-8     | 8.30                               | 7.91                             | 0.79 | 865.70                                | 47.43                                  | 234.5                                  |
| SSO-10    | 6.93                               | 19.20                            | 0.86 | 17.05                                 | 53.40                                  | 123.8                                  |
| SSO-12    | 7.80                               | 60.36                            | 0.86 | 5.97                                  | 270.30                                 | 115.9                                  |
| SSO-14    | 6.06                               | 67.93                            | 0.90 | 8.85                                  | 210.91                                 | 68.4                                   |
| SSO-16    | 7.08                               | 49.38                            | 0.82 | 8.46                                  | 222.32                                 | 186.2                                  |
| SSO-20    | 7.71                               | 8.40                             | 0.90 | 49.94                                 | 0.079                                  | 291.5                                  |

**Table S3** Summary of removal rate and kinetic constants of CIP (90 min)

|                                                                  |        | Removal rate /% | k /min <sup>-1</sup> | R <sup>2</sup> |
|------------------------------------------------------------------|--------|-----------------|----------------------|----------------|
| <b>Electrode <sup>a</sup></b>                                    | SSO-8  | 60.99           | 0.0110               | 0.987          |
|                                                                  | SSO-10 | 66.06           | 0.0125               | 0.991          |
|                                                                  | SSO-12 | 91.63           | 0.0282               | 0.995          |
|                                                                  | SSO-14 | 89.43           | 0.0262               | 0.988          |
|                                                                  | SSO-16 | 96.24           | 0.0355               | 0.995          |
|                                                                  | SSO-20 | 79.47           | 0.0174               | 0.988          |
| <b>Current density (mA cm<sup>-2</sup>) <sup>b</sup></b>         | 10     | 86.65           | 0.0232               | 0.983          |
|                                                                  | 15     | 96.24           | 0.0355               | 0.995          |
|                                                                  | 20     | 97.78           | 0.0429               | 0.994          |
|                                                                  | 25     | 99.77           | 0.0682               | 0.988          |
| <b>Electrolyte concentration (g L<sup>-1</sup>) <sup>c</sup></b> | 10     | 82.61           | 0.0203               | 0.989          |
|                                                                  | 20     | 97.78           | 0.0429               | 0.994          |
|                                                                  | 25     | 99.18           | 0.0506               | 0.982          |
|                                                                  | 30     | 92.14           | 0.0292               | 0.988          |
|                                                                  | 40     | 89.90           | 0.0266               | 0.991          |
| <b>Initial concentration (mg L<sup>-1</sup>) <sup>d</sup></b>    | 10     | 99.90           | 0.0918               | 0.986          |
|                                                                  | 30     | 99.18           | 0.0506               | 0.978          |
|                                                                  | 50     | 92.21           | 0.0297               | 0.987          |
|                                                                  | 80     | 74.01           | 0.0154               | 0.989          |
| <b>pH value <sup>e</sup></b>                                     | 3      | 99.97           | 0.0733               | 0.990          |
|                                                                  | 5      | 99.18           | 0.0506               | 0.978          |
|                                                                  | 7      | 99.44           | 0.0571               | 0.994          |
|                                                                  | 9      | 99.30           | 0.0547               | 0.992          |

59 The operating conditions of each group of experiments: <sup>a</sup> Current density = 15 mA cm<sup>-2</sup>, Na<sub>2</sub>SO<sub>4</sub>  
60 concentration = 25 g L<sup>-1</sup>, initial CIP concentration = 30 mg L<sup>-1</sup>, and initial pH = 5; <sup>b</sup> Na<sub>2</sub>SO<sub>4</sub>  
61 concentration = 25 g L<sup>-1</sup>, initial CIP concentration = 30 mg L<sup>-1</sup>, and initial pH = 5; <sup>c</sup> Current

62 density = 20 mA cm<sup>-2</sup>, initial CIP concentration = 30 mg L<sup>-1</sup>, and initial pH = 5. <sup>d</sup> Current density  
63 = 20 mA cm<sup>-2</sup>, Na<sub>2</sub>SO<sub>4</sub> concentration = 25 g L<sup>-1</sup>, and initial pH = 5. <sup>e</sup> Current density = 20 mA  
64 cm<sup>-2</sup>, Na<sub>2</sub>SO<sub>4</sub> concentration = 25 g L<sup>-1</sup>, and initial CIP concentration = 30 mg L<sup>-1</sup>.  
65

66 **Table S4** The possible intermediate products in the process of CIP degradation

| Intermediates | [M+H] <sup>+</sup><br>m/z | Feature fragment<br>m/z (relative intensity) | Structural formula                                                                   |
|---------------|---------------------------|----------------------------------------------|--------------------------------------------------------------------------------------|
| CIP           | 332                       | 314 (100), 231 (85)                          | 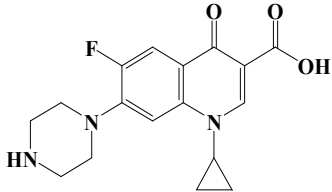   |
| A             | 306                       | 288 (100), 165 (36)                          |    |
| B             | 263                       | 245(100), 204(34)                            |   |
| C             | 245                       | 204 (100), 41 (57)                           |  |
| D             | 346                       | 330 (100), 302 (30)                          |  |
| E             | 334                       | 316 (100), 216 (68), 72 (47)                 |  |



---

**F** 316 217 (100), 72 (50), 230 (23)

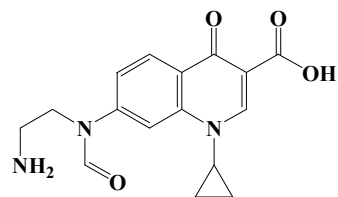

**G** 364 346(100), 330 (77)

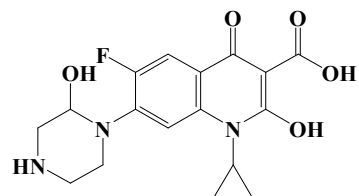

**H** 362 344(100)

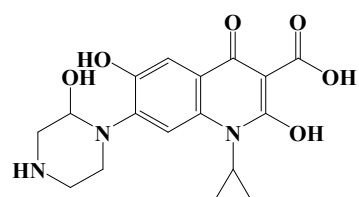

**I** 360 344(100)

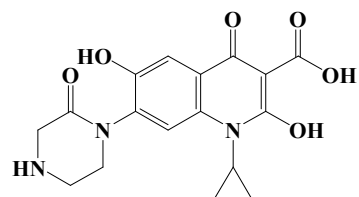

**J** 334 316 (100), 229 (32), 245 (16)

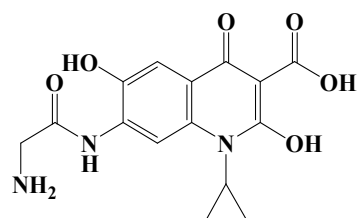

**K** 306 227 (100), 217 (95), 190 (53)

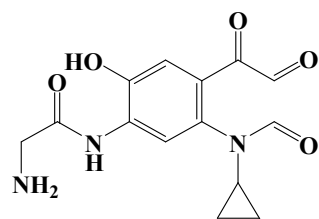

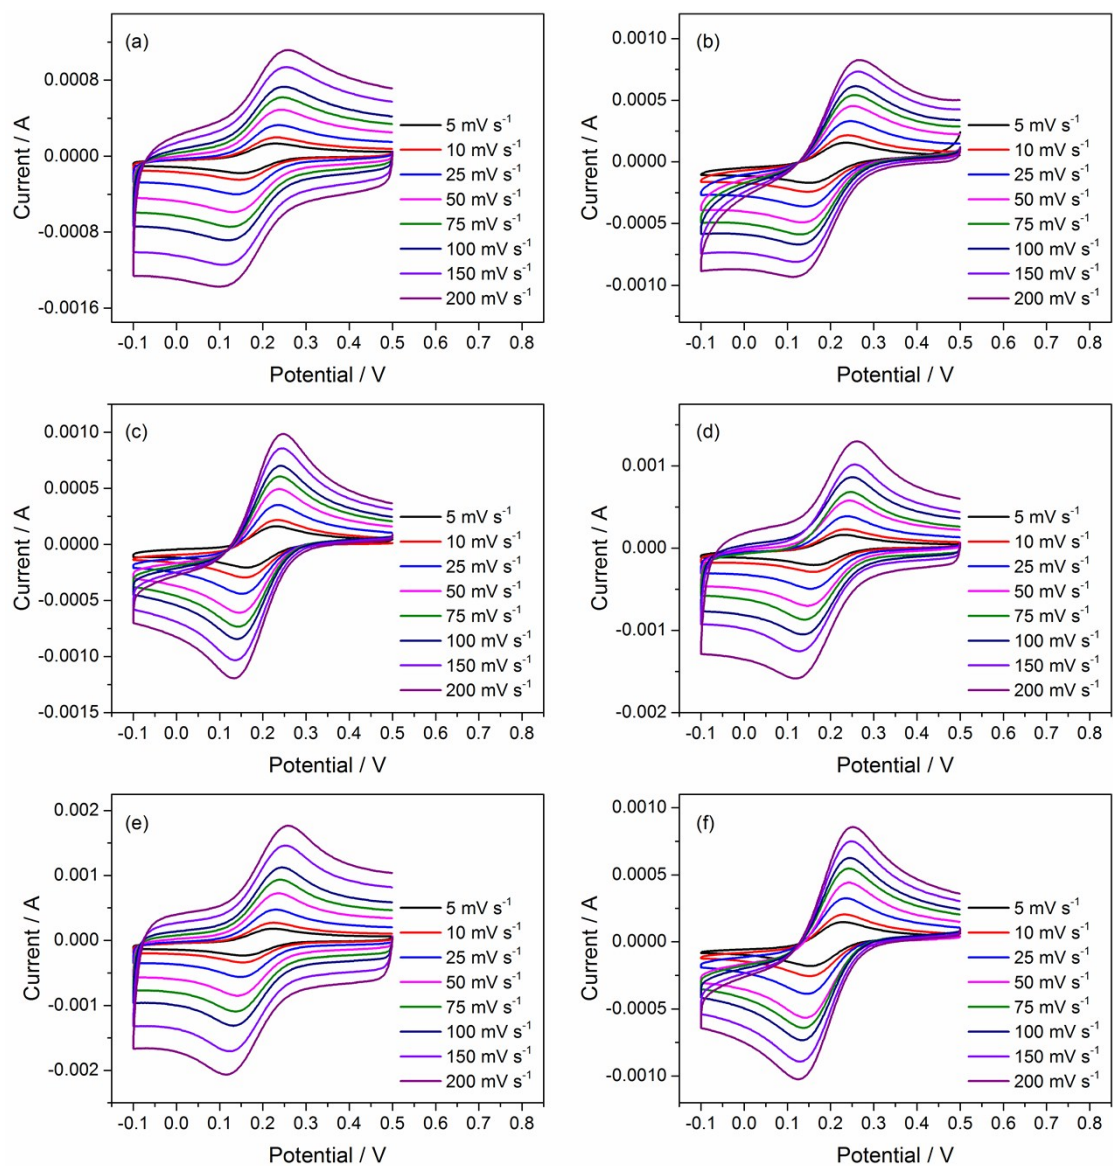

68

69 **Fig. S1** CV curves of electrodes in 0.1 M KCl solution containing 1 mM  $K_3Fe(CN)_6$ , (a) SSO-8, (b)  
 70 SSO-10, (c) SSO-12, (d) SSO-14, (e) SSO-16, and (f) SSO-20.

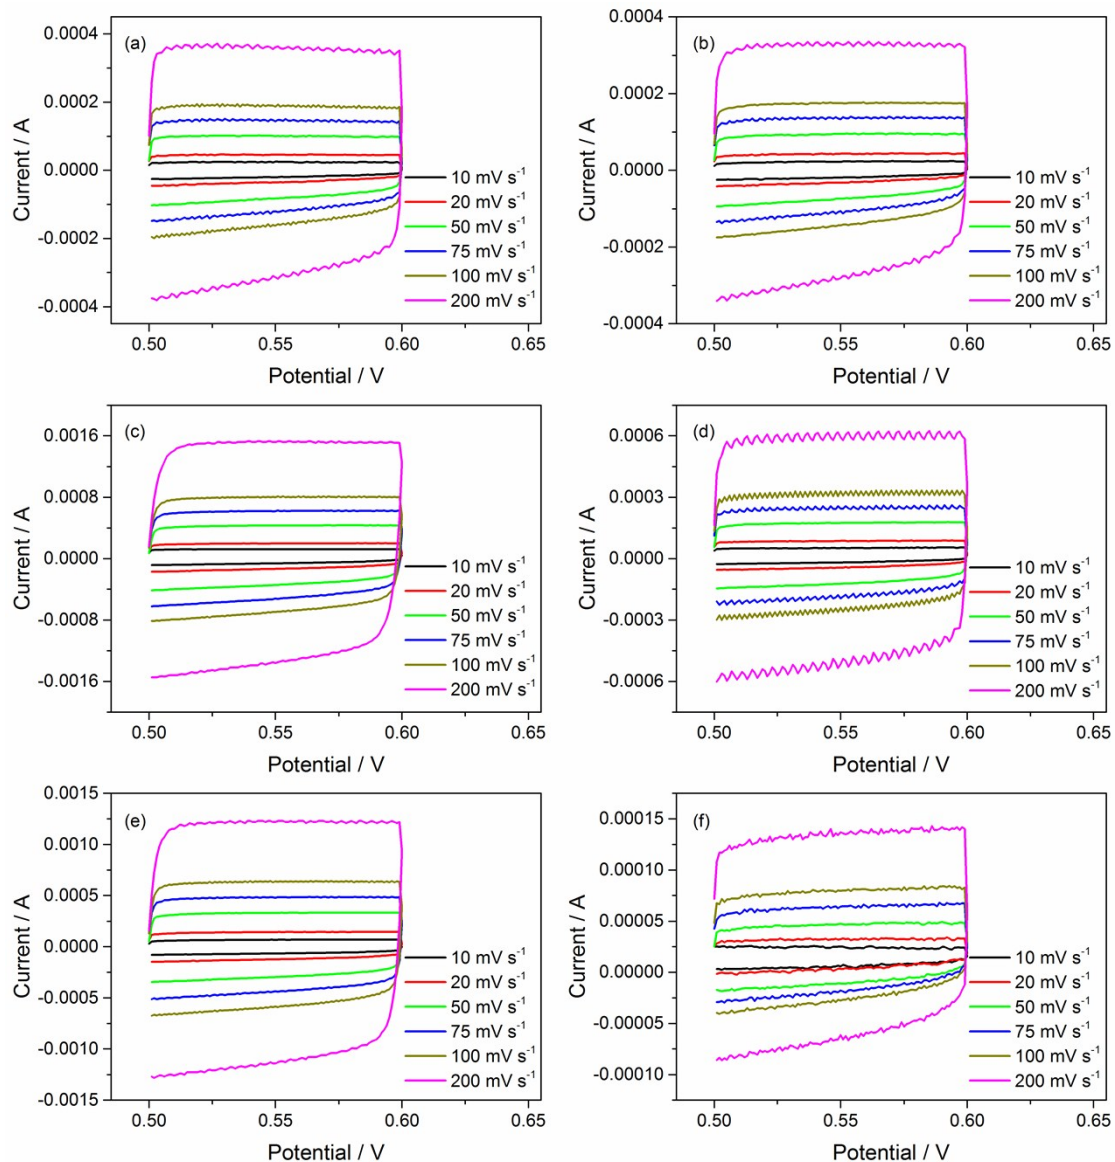

71  
72  
73

**Fig. S2** CV curves of different electrodes in 0.5 M KOH solution: (a) SSO-8, (b) SSO-10, (c) SSO-12, (d) SSO-14, (e) SSO-16, and (f) SSO-20.

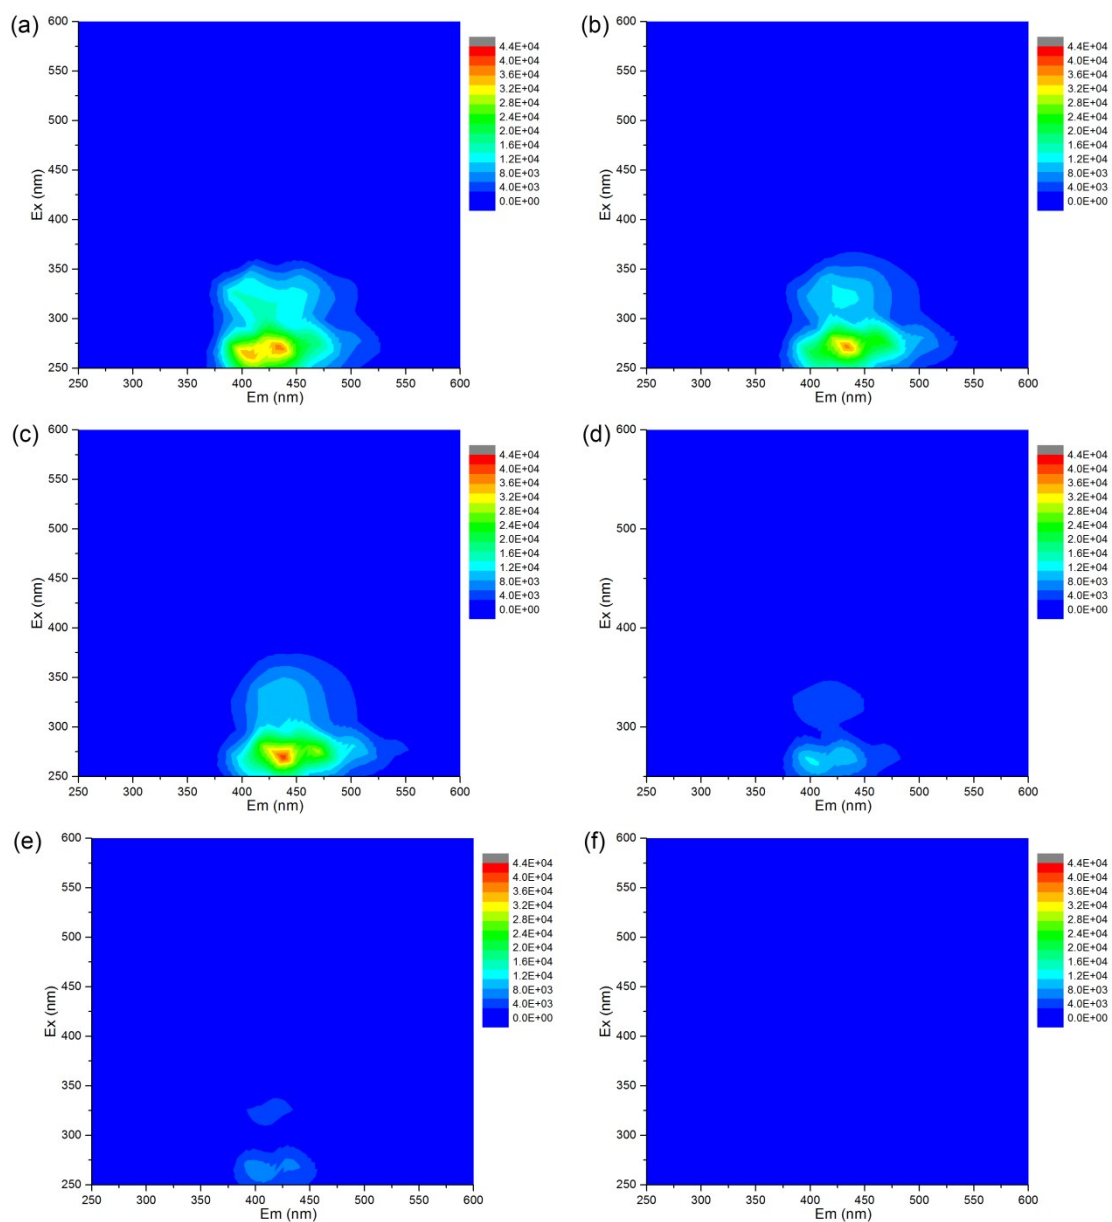

74

75 **Fig. S3** Three-dimensional excitation-emission matrix fluorescence spectra of the CIP solution  
 76 after electrocatalytic degradation of 0 min, 15 min, 30 min, 45min, 60min, and 90 min under the  
 77 optimized conditions (Current density = 20 mA cm<sup>-2</sup>, Na<sub>2</sub>SO<sub>4</sub> concentration = 25 g L<sup>-1</sup>, initial CIP  
 78 concentration = 30 mg L<sup>-1</sup>, and initial pH = 5).

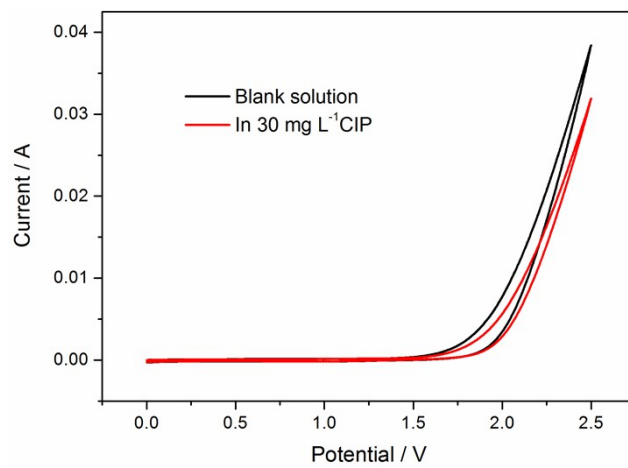

79

80 **Fig. S4** CV curves of the SSO-16 electrode with the absence and presence of CIP.

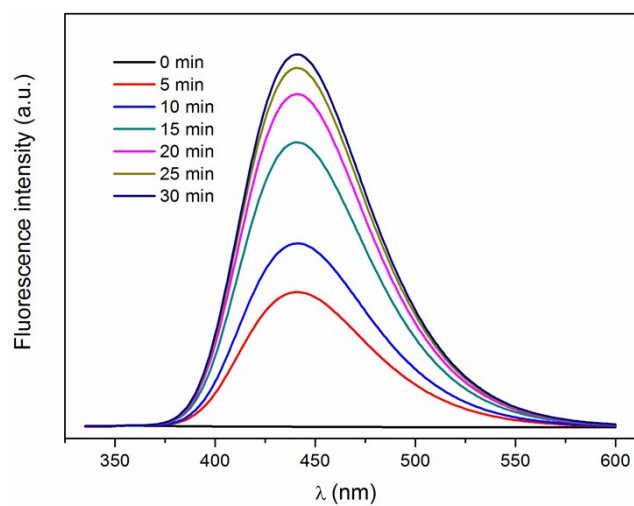

81

82 **Fig. S5** Fluorescence spectral of electrochemical oxidation of 0.5 mM terephthalic acid solution  
83 with the SSO-16 electrode.

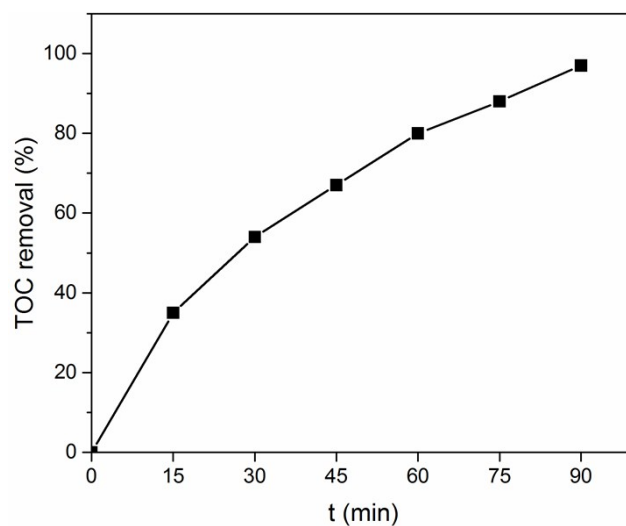

84

85 **Fig. S6** TOC removal ratio as a function of time under the optimal degradation conditions  
86 (Current density = 20 mA cm<sup>-2</sup>, Na<sub>2</sub>SO<sub>4</sub> concentration = 25 g L<sup>-1</sup>, initial CIP concentration = 30  
87 mg L<sup>-1</sup>, and initial pH = 5).

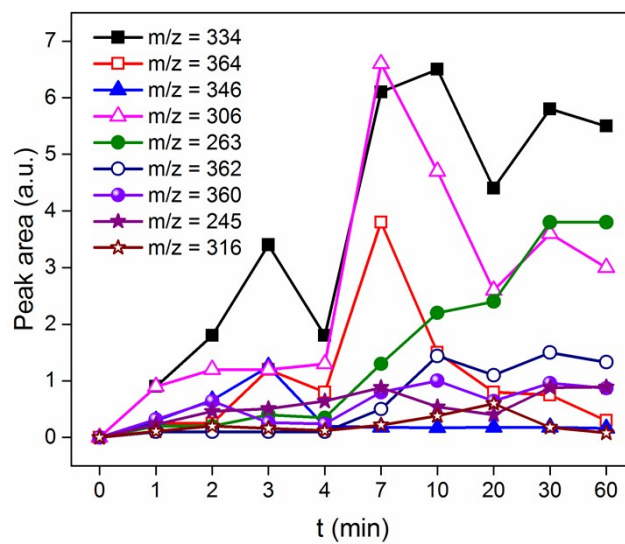

88

89 Fig. S7 Relative intensity variations of intermediates during the process of CIP degradation.



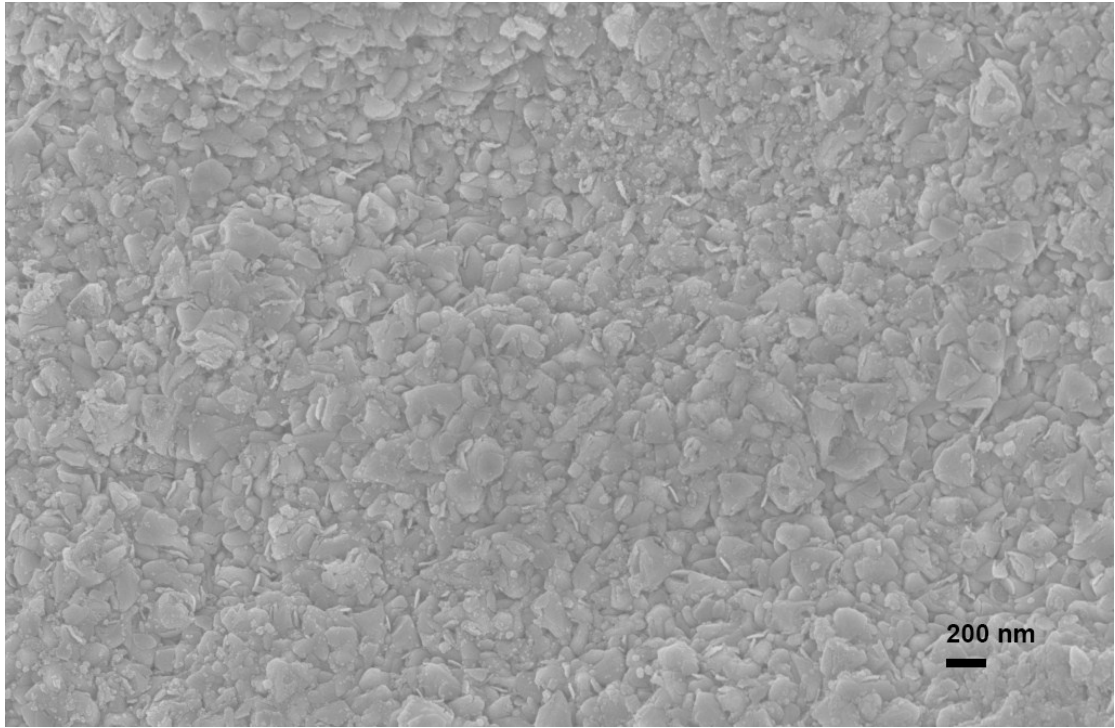

90

91 **Fig. S8** SEM image of the SSO-16 electrode after eight cycles of experiment.

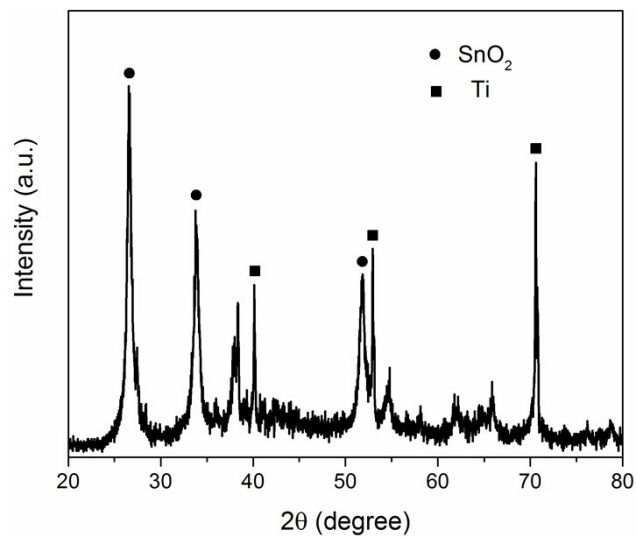

92

93

**Fig. S9** The XRD pattern of the SSO-16 electrode after eight cycles of experiment.
